# Supplementary material for: Fast and scalable inference of multi-sample cancer lineages
Source: PubMed Central journal article supplement (PMC4501097; doi:10.1186/s13059-015-0647-8), 2015-05-06
Supplement: 13059_2015_647_MOESM2_ESM.pdf [file 13059_2015_647_MOESM2_ESM.pdf]

## Experimental Details of the ccRCC, HGSC, and Xenoengraftment Comparison: Dataset Description and Parameter Settings

**ccRCC.** The clear cell renal cell carcinoma (ccRCC) study by Gerlinger et. al [21] validated 602 nonsynonymous nucleotide substitutions and indels from multiple samples of 8 individuals using ultra-deep amplicon sequencing with an average depth of  $>400x$ . The analysis was performed on 587 out of these mutations guaranteeing a minimum coverage higher than  $100x$ . Based on the expected sequencing platform error rate, mutations were called in a sample if their VAF was  $\geq 0.5\%$  for substitutions and  $1\%$  for indels. In accordance with the study, we set the cutoffs to  $T_{present} = T_{absent} = 0.005$  for calling SSNVs across samples for all patients except RMH004 and required at least two mutations as evidence of a node in the tree. For RMH004 we set  $T_{present} = T_{absent} = 0.01$  to allow editing, observing that some mutations with the frequencies slightly higher than  $0.5\%$  were considered absent in some samples of the study.

**HGSC.** In the high-grade ovarian cancer (HGSC) dataset from the study by Bashashati et. al. [27], 19 tumor samples from six patients were used to validate 340 somatic mutations using deep amplicon sequencing (with a median coverage of  $> 5000x$ ). When running LICHeE, we used the hard thresholds of  $T_{absent} = 0.005$  and  $T_{present} = 0.01$  for all the patients except Case5, where we used  $T_{absent} = 0.01$  and  $T_{present} = 0.04$  due to a higher level of noise in the data, and required at least three mutations as evidence of a node in the tree. For Case5 we also removed the samples g and h from consideration since they had multiple inconclusive validation results as stated in the manuscript [27]. The explicit command-line settings used for each patient are listed in the project repository <https://github.com/viq854/lichee>, see file LICHeE/data/README.

**Xenoengraftment.** The study by Eirew et. al. [32] used deep-genome and single-cell sequencing to evaluate the clonal dynamics of xenoengraftment of breast cancer tissue into immunodeficient mice. Single-cell analysis was done on passages SA501 (samples X1, X2, and X4) and SA494 (samples T and X4). When running LICHeE on both passages, we used the hard thresholds of  $T_{absent} = 0.03$  and  $T_{present} = 0.05$  (the value  $0.05$  was indicated in the study’s supplementary materials); a minimum cluster size of 6 for non-private mutations and 5 for private mutations; and a maximum cluster collapse distance of  $0.085$ .
